# Supplementary material for: Delimiting genetic units in Neotropical toads under incomplete lineage sorting and hybridization
Source: Springer Nature journal article supplement (doi:10.1186/1471-2148-12-242), 2012-01-01

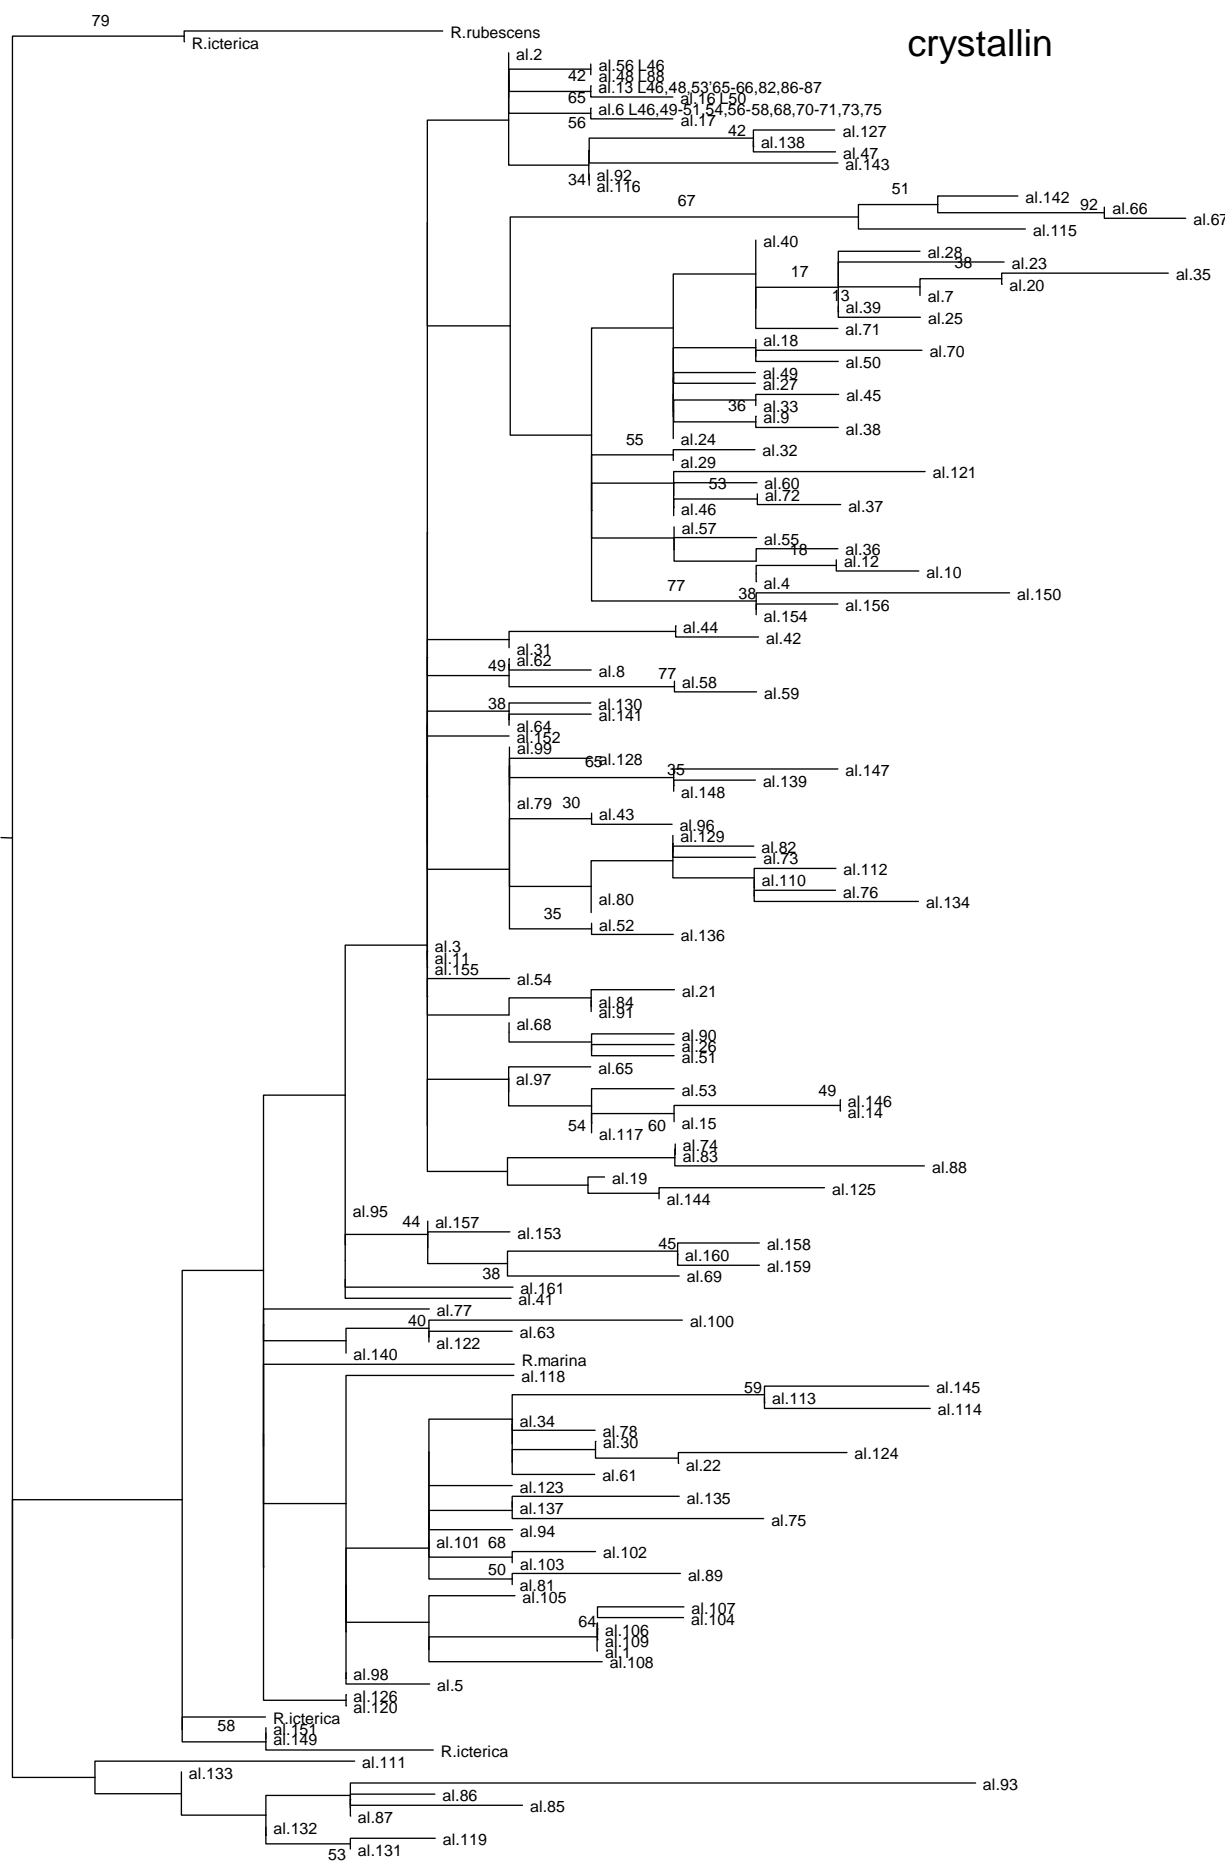

### Alpha polypeptide

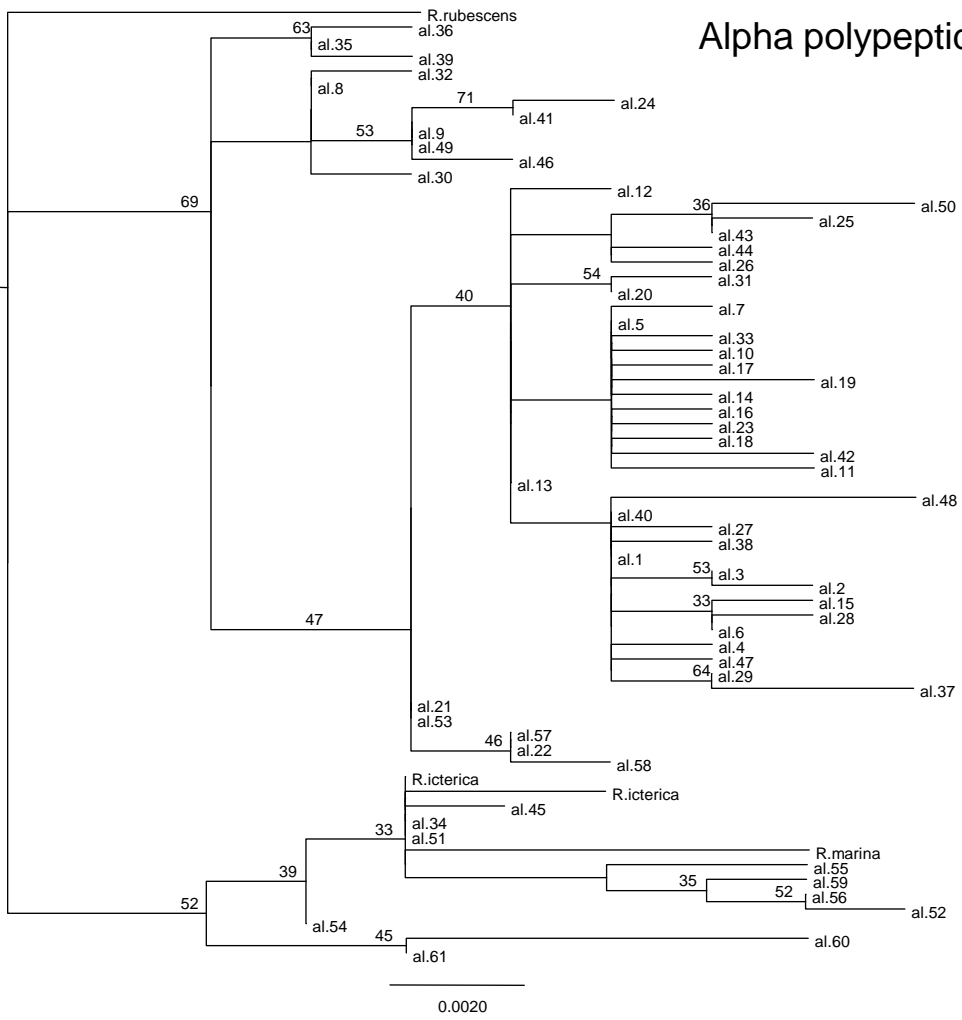

### rhodopsin

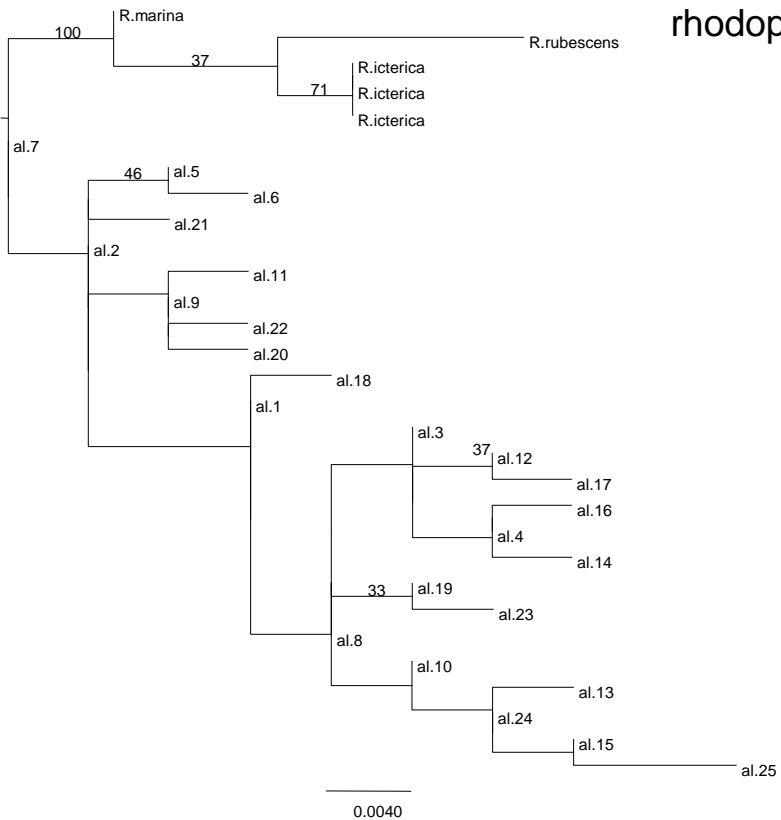

Supplement: 12862_2012_2248_MOESM1_ESM.pdf [file 12862_2012_2248_MOESM1_ESM.pdf]
