# Supplementary material for: Delimiting genetic units in Neotropical toads under incomplete lineage sorting and hybridization
Source: Springer Nature journal article supplement (doi:10.1186/1471-2148-12-242), 2012-01-01
Supplement: 12862_2012_2248_MOESM2_ESM.pdf [file 12862_2012_2248_MOESM2_ESM.pdf]

**Additional file 2:** Individuals samples in this study. Columns indicate voucher or tissue number, municipality and state of the sampled locality, locality code (L), sequenced mtDNA fragments, mtDNA haplotype (Hap.), mtDNA main clade or subclade (clade), allele number for alleles 1 and 2 of sequenced nuclear fragments, and individual number in the STRUCTURE analysis (STR).

| number      | municipality  | state | L  | mtDNA           |        |       | nuclear    |      |            |      |           |      |     |
|-------------|---------------|-------|----|-----------------|--------|-------|------------|------|------------|------|-----------|------|-----|
|             |               |       |    | fragments       | Hap.   | clade | a.polypep. |      | crystallin |      | rhodopsin |      | STR |
|             |               |       |    |                 |        |       | al.1       | al.2 | al.1       | al.2 | al.1      | al.2 |     |
| CFBH-T10831 | Guaramiranga  | CE    | 1  | control,ND1,ND2 | hap1   | G     | 1          | 2    | 1          | 1    | 1         | 2    | 1   |
| CFBH-T10832 | Guaramiranga  | CE    | 1  | control,ND1,ND2 | hap1   | G     | 3          | 3    | 1          | 1    | 1         | 2    | 2   |
| CFBH-T10833 | Guaramiranga  | CE    | 1  | control,ND1,ND2 | hap2   | G     | 1          | 2    | 1          | 1    | 2         | 2    | 3   |
| CFBH-T10834 | Guaramiranga  | CE    | 1  | control,ND1,ND2 | hap1   | G     | 1          | 2    | 1          | 1    | 2         | 2    | 4   |
| CFBH-T10841 | Guaramiranga  | CE    | 1  | control,ND1,ND2 | hap1   | G     | -          | -    | -          | -    | -         | -    | -   |
| PHV1450     | São Desidério | BA    | 2  | ND1,ND2         | hap289 | P     | -          | -    | 150        | 150  | 20        | 20   | -   |
| PHV1451     | São Desidério | BA    | 2  | ND1,ND2         | hap290 | P     | -          | -    | 150        | 150  | 2         | 24   | -   |
| MTJ26       | Januária      | MG    | 3  | control,ND1,ND2 | hap285 | P     | 48         | 49   | 150        | 150  | 20        | 11   | 5   |
| MTJ27       | Januária      | MG    | 3  | control,ND1,ND2 | hap286 | P     | -          | -    | 150        | 150  | 2         | 24   | -   |
| MTJ53       | Januária      | MG    | 3  | control,ND1,ND2 | hap285 | P     | 9          | 9    | 150        | 150  | 20        | 11   | 6   |
| MTJ54       | Januária      | MG    | 3  | control,ND1,ND2 | hap287 | P     | 1          | 9    | 150        | 150  | 2         | 24   | 7   |
| MTJ55       | Januária      | MG    | 3  | control,ND1,ND2 | hap286 | P     | -          | -    | 150        | 150  | 2         | 24   | -   |
| MTJ56       | Januária      | MG    | 3  | control,ND1,ND2 | hap285 | P     | 50         | 48   | -          | -    | -         | -    | -   |
| MTJ71       | Januária      | MG    | 3  | control,ND1,ND2 | hap285 | P     | 48         | 48   | 150        | 150  | 2         | 24   | 8   |
| MTJ72       | Januária      | MG    | 3  | control,ND1,ND2 | hap288 | P     | 48         | 48   | 150        | 150  | 7         | 7    | 9   |
| MTJ84       | Januária      | MG    | 3  | control,ND1,ND2 | hap287 | P     | 48         | 49   | 150        | 150  | 20        | 20   | 10  |
| MTJ85       | Januária      | MG    | 3  | control,ND1,ND2 | hap285 | P     | 48         | 48   | 150        | 150  | 20        | 20   | 11  |
| CFBH-T3642  | Areia         | PB    | 4  | control,ND1,ND2 | hap222 | N     | 37         | 36   | 106        | 107  | 8         | 8    | 12  |
| CFBH-T3645  | Recife        | PE    | 5  | control,ND1,ND2 | hap223 | N     | -          | -    | 108        | 109  | 11        | 11   | -   |
| CFBH-T3650  | Recife        | PE    | 5  | control,ND1,ND2 | hap223 | N     | -          | -    | 110        | 111  | 2         | 2    | -   |
| CFBH-T3658  | Recife        | PE    | 5  | control,ND1,ND2 | hap223 | N     | -          | -    | 1          | 1    | 2         | 2    | -   |
| CFBH-T3663  | Recife        | PE    | 5  | control,ND1,ND2 | hap223 | N     | -          | -    | 112        | 113  | 2         | 2    | -   |
| CFBH-T9161  | Itacaré       | BA    | 6  | control,ND1,ND2 | hap248 | N     | 5          | 37   | 129        | 129  | 11        | 11   | 13  |
| MNRJ35341   | Itacaré       | BA    | 6  | control,ND1,ND2 | hap273 | N     | -          | -    | 141        | 142  | 11        | 11   | -   |
| MNRJ35342   | Itacaré       | BA    | 6  | ND1,ND2         | hap274 | N     | 37         | 35   | -          | -    | 11        | 11   | -   |
| CFBH-T9233  | Aurelino Leal | BA    | 7  | control,ND1,ND2 | hap280 | N     | -          | -    | 117        | 146  | 11        | 11   | -   |
| CFBH-T4151  | Uruçuca       | BA    | 8  | control,ND1,ND2 | hap232 | N     | 35         | 35   | 118        | 119  | 11        | 21   | 14  |
| CFBH-T9129  | Uruçuca       | BA    | 8  | control,ND1,ND2 | hap244 | N     | 5          | 36   | -          | -    | 2         | 2    | -   |
| CFBH-T9131  | Uruçuca       | BA    | 8  | ND1,ND2         | hap245 | N     | 42         | 35   | 126        | 105  | -         | -    | -   |
| CFBH-T9132  | Uruçuca       | BA    | 8  | control,ND1,ND2 | hap246 | N     | 37         | 39   | 128        | 5    | 2         | 22   | 15  |
| CFBH-T9140  | Uruçuca       | BA    | 8  | control,ND1,ND2 | hap247 | N     | 35         | 36   | -          | -    | 2         | 11   | -   |
| CFBH-T9141  | Uruçuca       | BA    | 8  | control,ND1,ND2 | hap248 | N     | 42         | 37   | -          | -    | 11        | 11   | -   |
| CFBH-T9147  | Uruçuca       | BA    | 8  | control,ND1,ND2 | hap249 | N     | 5          | 36   | -          | -    | 1         | 22   | -   |
| CFBH-T9176  | Uruçuca       | BA    | 8  | ND1,ND2         | hap245 | N     | 1          | 35   | -          | -    | 11        | 11   | -   |
| CFBH-T9181  | Uruçuca       | BA    | 8  | control,ND1,ND2 | hap249 | N     | 36         | 39   | -          | -    | 11        | 11   | -   |
| CFBH-T3572  | Itabuna       | BA    | 9  | ND1,ND2         | hap214 | N     | 35         | 36   | -          | -    | 11        | 11   | -   |
| CFBH-T3577  | Itabuna       | BA    | 9  | control,ND1,ND2 | hap215 | N     | -          | -    | -          | -    | 11        | 11   | -   |
| CFBH-T3578  | Itabuna       | BA    | 9  | control,ND1,ND2 | hap216 | N     | 36         | 36   | -          | -    | 11        | 11   | -   |
| CFBH-T3586  | Itabuna       | BA    | 9  | ND1             | hap217 | N     |            |      |            |      |           |      | -   |
| CFBH-T3591  | Itabuna       | BA    | 9  | control,ND1,ND2 | hap218 | N     | 36         | 36   | -          | -    | 11        | 11   | -   |
| CFBH-T3596  | Itabuna       | BA    | 9  | control,ND1,ND2 | hap219 | N     | 35         | 36   | -          | -    | 2         | 11   | -   |
| CFBH-T3605  | Itabuna       | BA    | 9  | control,ND1,ND2 | hap220 | N     | -          | -    | 105        | 105  | 11        | 11   | -   |
| CFBH-T3609  | Itabuna       | BA    | 9  | control,ND1,ND2 | hap221 | N     | 5          | 36   | -          | -    | 11        | 11   | -   |
| MRT 5806    | Jussari       | BA    | 10 | control,ND1,ND2 | hap268 | N     | 38         | 35   | -          | -    | 2         | 11   | -   |
| MRT 5975    | Jussari       | BA    | 10 | control,ND1,ND2 | hap267 | N     | 38         | 36   | 139        | 105  | 11        | 11   | 16  |
| MTR 13599   | Camacan       | BA    | 11 | control,ND1,ND2 | hap260 | N     | 29         | 39   | 134        | 135  | 11        | 11   | 17  |
| MTR 13608   | Camacan       | BA    | 11 | control,ND1,ND2 | hap261 | N     | 9          | 9    | 114        | 84   | 11        | 11   | 18  |

| number      | municipality        | state | L  | mtDNA           |        |       | nuclear    |      |            |      |           |      |     |
|-------------|---------------------|-------|----|-----------------|--------|-------|------------|------|------------|------|-----------|------|-----|
|             |                     |       |    | fragments       | Hap.   | clade | a.polypep. |      | crystallin |      | rhodopsin |      | STR |
|             |                     |       |    |                 |        |       | al.1       | al.2 | al.1       | al.2 | al.1      | al.2 |     |
| MTR 13609   | Camacan             | BA    | 11 | control,ND1,ND2 | hap262 | N     | 5          | 9    | -          | -    | 2         | 11   | -   |
| MTR 13610   | Camacan             | BA    | 11 | control,ND1,ND2 | hap261 | N     | 9          | 39   | 136        | 137  | 11        | 11   | 19  |
| MTR 13620   | Camacan             | BA    | 11 | control,ND1,ND2 | hap263 | N     | -          | -    | -          | -    | 11        | 11   | -   |
| MTR 13621   | Camacan             | BA    | 11 | control,ND1,ND2 | hap264 | N     | 5          | 29   | -          | -    | -         | -    | -   |
| MTR16007    | Camacan             | BA    | 11 | control,ND1,ND2 | hap277 | N     | 35         | 9    | 144        | 119  | -         | -    | -   |
| MTR16011    | Camacan             | BA    | 11 | control,ND1,ND2 | hap278 | N     | 38         | 9    | -          | -    | -         | -    | -   |
| MTR16045    | Camacan             | BA    | 11 | control,ND1,ND2 | hap260 | N     | 38         | 35   | 105        | 145  | -         | -    | -   |
| CFBH-T12560 | Camacan             | BA    | 11 | control,ND1,ND2 | hap281 | N     | 5          | 1    | 114        | 147  | 11        | 11   | 20  |
| CFBH-T12561 | Camacan             | BA    | 11 | control,ND1,ND2 | hap282 | N     | 5          | 35   | 148        | 121  | 11        | 11   | 21  |
| CFBH-T12564 | Camacan             | BA    | 11 | control,ND1,ND2 | hap283 | N     | 36         | 36   | -          | -    | 11        | 11   | -   |
| CFBH-T12565 | Camacan             | BA    | 11 | control,ND1,ND2 | hap284 | N     | 5          | 39   | 117        | 149  | 11        | 11   | 22  |
| PUCMG2      | Sta. Maria do Salto | MG    | 12 | control,ND1,ND2 | hap258 | N     | 5          | 38   | -          | -    | -         | -    | -   |
| MNRJ38920   | Porto Seguro        | BA    | 13 | control,ND1,ND2 | hap275 | N     | 38         | 36   | 143        | 105  | 2         | 11   | 23  |
| MNRJ38921   | Porto Seguro        | BA    | 13 | control,ND1,ND2 | hap265 | N     | 46         | 5    | 131        | 117  | 11        | 11   | 24  |
| CFBH-T2389  | Grão Mogol          | MG    | 14 | control,ND1,ND2 | hap207 | N     | 1          | 1    | 99         | 81   | 11        | 11   | 25  |
| PUCMG1      | Cristália           | MG    | 15 | ND1,ND2         | hap279 | N     | 1          | 47   | 81         | 140  | -         | -    | -   |
| MTR 13384   | Trancoso            | BA    | 16 | control,ND1,ND2 | hap255 | N     | 38         | 38   | -          | -    | 2         | 11   | -   |
| MTR 13385   | Trancoso            | BA    | 16 | control,ND1,ND2 | hap256 | N     | 5          | 43   | 131        | 117  | -         | -    | -   |
| MTR 13472   | Trancoso            | BA    | 16 | control,ND1,ND2 | hap257 | N     | 5          | 38   | -          | -    | 11        | 11   | -   |
| MTR 13482   | Trancoso            | BA    | 16 | control,ND1,ND2 | hap258 | N     | 29         | 44   | 132        | 133  | 11        | 11   | 26  |
| MTR 13594   | Trancoso            | BA    | 16 | control,ND1,ND2 | hap259 | N     | 5          | 44   | 66         | 99   | 11        | 11   | 27  |
| MTR 13595   | Trancoso            | BA    | 16 | control,ND1,ND2 | hap230 | N     | -          | -    | -          | -    | 2         | 11   | -   |
| MTR 13646   | Trancoso            | BA    | 16 | control,ND1,ND2 | hap265 | N     | 29         | 35   | -          | -    | 11        | 11   | -   |
| CFBH-T4062  | Caraíva             | BA    | 17 | control,ND1,ND2 | hap224 | N     | 38         | 38   | 114        | 115  | 2         | 11   | 28  |
| CFBH-T4063  | Caraíva             | BA    | 17 | control,ND1,ND2 | hap225 | N     | 5          | 39   | 116        | 115  | 11        | 11   | 29  |
| CFBH-T4064  | Caraíva             | BA    | 17 | control,ND1,ND2 | hap226 | N     | 5          | 38   | 99         | 82   | 11        | 11   | 30  |
| CFBH-T4065  | Caraíva             | BA    | 17 | control,ND1,ND2 | hap227 | N     | 35         | 9    | -          | -    | 11        | 11   | -   |
| CFBH-T4066  | Caraíva             | BA    | 17 | control,ND1,ND2 | hap228 | N     | 5          | 8    | -          | -    | 11        | 11   | -   |
| CFBH-T4067  | Caraíva             | BA    | 17 | control,ND1,ND2 | hap229 | N     | -          | -    | -          | -    | 11        | 11   | -   |
| CFBH-T4068  | Caraíva             | BA    | 17 | control,ND1,ND2 | hap224 | N     | -          | -    | -          | -    | 11        | 11   | -   |
| CFBH-T4069  | Caraíva             | BA    | 17 | control,ND1,ND2 | hap227 | N     | 5          | 1    | 114        | 117  | 11        | 8    | 31  |
| CFBH-T4070  | Caraíva             | BA    | 17 | control,ND1,ND2 | hap230 | N     | 38         | 38   | -          | -    | 11        | 11   | -   |
| CFBH-T4071  | Caraíva             | BA    | 17 | control,ND1,ND2 | hap231 | N     | 38         | 5    | -          | -    | 11        | 11   | -   |
| CFBH-T7689  | Prado               | BA    | 18 | control,ND1,ND2 | hap239 | N     | 5          | 9    | 66         | 127  | 2         | 11   | 32  |
| AF402       | Santa Bárbara       | MG    | 19 | control,ND1,ND2 | hap266 | N     | 20         | 9    | 138        | 121  | 11        | 11   | 33  |
| CFBH-T7652  | Nova Lima           | MG    | 20 | control,ND1,ND2 | hap238 | N     | 1          | 27   | 125        | 125  | 2         | 11   | -   |
| CFBH-T7660  | Nova Lima           | MG    | 20 | control,ND1,ND2 | hap94  | C     | -          | -    | 126        | 126  | 11        | 11   | -   |
| CFBH-T7664  | Nova Lima           | MG    | 20 | control,ND1,ND2 | hap237 | N     | 5          | 5    | -          | -    | 2         | 11   | 34  |
| JC 794      | Mariana             | MG    | 21 | control,ND1,ND2 | hap153 | C     | 8          | 9    | 80         | 81   | 11        | 11   | 35  |
| CFBH-T7482  | Ouro Branco         | MG    | 22 | control,ND1,ND2 | hap92  | C     | 20         | 8    | 65         | 66   | 2         | 11   | 36  |
| CFBH-T7492  | Ouro Branco         | MG    | 22 | control,ND1,ND2 | hap93  | C     | -          | -    | 67         | 66   | 11        | 11   | -   |
| CFBH-T7532  | Ouro Branco         | MG    | 22 | control,ND1,ND2 | hap94  | C     | 5          | 8    | 68         | 69   | 11        | 11   | 37  |
| MNRJ38327   | Catas Altas         | MG    | 23 | control,ND1,ND2 | hap190 | C     | 29         | 30   | 87         | 87   | 2         | 2    | 39  |
| MNRJ38329   | Catas Altas         | MG    | 23 | ND1,ND2         | hap191 | C     | 31         | 32   | 88         | 89   | 2         | 11   | 38  |
| CFBH-T10842 | Belo Horizonte      | MG    | 24 | control,ND1,ND2 | hap116 | C     | 8          | 9    | -          | -    | 7         | 8    | -   |
| MTR 11543   | Santa Marta         | MG    | 25 | control,ND1,ND2 | hap157 | C     | -          | -    | 83         | 83   | 10        | 10   | -   |
| MTR 11548   | Santa Marta         | MG    | 25 | control,ND1,ND2 | hap158 | C     | -          | -    | 84         | 85   | 11        | 11   | -   |
| MTR15751    | Espera Feliz        | ES    | 26 | control,ND1,ND2 | hap193 | C     | 5          | 5    | 90         | 91   | 2         | 11   | 40  |
| MTR15756    | Espera Feliz        | ES    | 26 | control,ND1,ND2 | hap276 | N     | -          | -    | -          | -    | 2         | 11   | -   |
| MTR 11588   | Córrego Calçado     | ES    | 27 | control,ND1,ND2 | hap159 | C     | -          | -    | 84         | 84   | 11        | 11   | -   |
| MRT 1252    | Ibitirama           | ES    | 28 | control,ND1,ND2 | hap141 | C     | 1          | 1    | 77         | 77   | 2         | 2    | 41  |
| MRT 1253    | Ibitirama           | ES    | 28 | control,ND1,ND2 | hap142 | C     | 1          | 24   | -          | -    | 2         | 11   | -   |
| MTR 12585   | Ibitirama           | ES    | 28 | control,ND1,ND2 | hap146 | C     | 24         | 25   | 78         | 79   | 11        | 11   | 42  |
| MTR 12609   | Ibitirama           | ES    | 28 | control,ND1,ND2 | hap141 | C     | -          | -    | -          | -    | 2         | 11   | -   |

| number      | municipality        | state | L  | mtDNA           |        |       | nuclear    |      |            |      |           |      | STR |
|-------------|---------------------|-------|----|-----------------|--------|-------|------------|------|------------|------|-----------|------|-----|
|             |                     |       |    | fragments       | Hap.   | clade | a.polypep. |      | crystallin |      | rhodopsin |      |     |
|             |                     |       |    |                 |        |       | al.1       | al.2 | al.1       | al.2 | al.1      | al.2 |     |
| MTR 10732   | Caparaó             | MG    | 29 | control,ND1,ND2 | hap269 | N     | 27         | 8    | 82         | 82   | 23        | 23   | 44  |
| MTR 10733   | Caparaó             | MG    | 29 | control,ND1,ND2 | hap156 | C     | 26         | 27   | 82         | 67   | 11        | 11   | 43  |
| MTR15775    | Dores do Rio Preto  | ES    | 30 | control,ND1,ND2 | hap194 | C     |            |      |            |      |           |      | -   |
| CFBH-T9177  | Sooretama           | ES    | 31 | control,ND1,ND2 | hap291 | N     | 5          | 35   | 97         | 98   | 11        | 11   | 45  |
| CFBH-T5935  | Sooretama           | ES    | 31 | control,ND1,ND2 | hap233 | N     | 1          | 1    | 120        | 121  | -         | -    | -   |
| CFBH-T5936  | Sooretama           | ES    | 31 | control,ND1,ND2 | hap234 | N     | 5          | 1    | 122        | 123  | 1         | 2    | 47  |
| CFBH-T5945  | Sooretama           | ES    | 31 | control,ND1,ND2 | hap235 | N     | 9          | 9    | 114        | 124  | 1         | 2    | 46  |
| CFBH-T10466 | Linhares            | ES    | 32 | control,ND1,ND2 | hap250 | N     | 5          | 1    | -          | -    | 11        | 11   | -   |
| CFBH-T9043  | Linhares            | ES    | 32 | control,ND1,ND2 | hap242 | N     | -          | -    | -          | -    | 11        | 11   | -   |
| CFBH-T9046  | Linhares            | ES    | 32 | control,ND1,ND2 | hap243 | N     | 5          | 5    | 129        | 129  | 11        | 11   | 48  |
| MTR 12132   | Linhares            | ES    | 32 | control,ND1,ND2 | hap270 | N     | 5          | 1    | -          | -    | 11        | 11   | -   |
| MTR 12200   | Linhares            | ES    | 32 | control,ND1,ND2 | hap271 | N     | 5          | 5    | 140        | 131  | 11        | 11   | 49  |
| MTR 12248   | Linhares            | ES    | 32 | control,ND1,ND2 | hap272 | N     | 5          | 9    | 99         | 105  | 11        | 11   | 50  |
| CFBH-T3362  | Aracruz             | ES    | 33 | control,ND1,ND2 | hap208 | N     | 5          | 1    | -          | -    | 11        | 11   | -   |
| CFBH-T3367  | Aracruz             | ES    | 33 | control,ND1,ND2 | hap41  | C     | 1          | 14   | 43         | 43   | 11        | 8    | 51  |
| CFBH-T3370  | Aracruz             | ES    | 33 | control,ND1,ND2 | hap209 | N     | 1          | 9    | -          | -    | 11        | 11   | -   |
| CFBH-T3373  | Aracruz             | ES    | 33 | control,ND1,ND2 | hap210 | N     | 24         | 9    | 82         | 101  | 11        | 11   | 52  |
| CFBH-T9008  | Santa Leopoldina    | ES    | 34 | control,ND1,ND2 | hap240 | N     | 5          | 1    | 128        | 5    | 11        | 11   | 53  |
| CFBH-T9009  | Santa Leopoldina    | ES    | 34 | control,ND1,ND2 | hap240 | N     | 40         | 41   | -          | -    | 19        | 11   | -   |
| CFBH-T9014  | Santa Leopoldina    | ES    | 34 | control,ND1,ND2 | hap241 | N     | 5          | 1    | -          | -    | 11        | 11   | -   |
| CFBH-T9080  | Santa Leopoldina    | ES    | 34 | control,ND1,ND2 | hap110 | C     | -          | -    | -          | -    | 2         | 11   | -   |
| CFBH-T9178  | Santa Tereza        | ES    | 35 | control,ND1,ND2 | hap206 | N     | 5          | 35   | 99         | 100  | 2         | 11   | 54  |
| CFBH-T5953  | Santa Tereza        | ES    | 35 | control,ND1,ND2 | hap236 | N     | -          | -    | -          | -    | 1         | 2    | -   |
| MNRJ34956   | Santa Tereza        | ES    | 35 | control,ND1,ND2 | hap236 | N     | 24         | 45   | -          | -    | 2         | 2    | -   |
| CFBH-T3393  | Vila Velha          | ES    | 36 | control,ND1,ND2 | hap206 | N     | -          | -    | -          | -    | 2         | 11   | -   |
| CFBH-T3397  | Vila Velha          | ES    | 36 | control,ND1,ND2 | hap211 | N     | 24         | 9    | 102        | 103  | 11        | 11   | 55  |
| CFBH-T3400  | Vila Velha          | ES    | 36 | control         | hap212 | N     |            |      |            |      |           |      | -   |
| CFBH-T3407  | Vila Velha          | ES    | 36 | control,ND1,ND2 | hap213 | N     | 24         | 24   | 104        | 104  | 2         | 11   | 56  |
| LSH1        | Guarapari           | ES    | 37 | ND1             | hap251 | N     |            |      |            |      |           |      | -   |
| LSH38       | Guarapari           | ES    | 37 | control,ND1,ND2 | hap252 | N     | 5          | 1    | 130        | 100  | -         | -    | -   |
| LSH39       | Guarapari           | ES    | 37 | control,ND1,ND2 | hap253 | N     | 5          | 5    | 95         | 96   | 2         | 2    | 57  |
| LSH60       | Anchieta            | ES    | 38 | ND1,ND2         | hap254 | N     |            |      |            |      |           |      | -   |
| MTR 1237    | S. José do Calçado  | ES    | 39 | control,ND1,ND2 | hap140 | C     | 5          | 1    | 75         | 76   | 2         | 2    | 58  |
| CFBH-T9324  | Teresópolis         | RJ    | 40 | control,ND1,ND2 | hap204 | C     | 1          | 1    | -          | -    | 2         | 20   | -   |
| CFBH-T9325  | Teresópolis         | RJ    | 40 | control,ND1,ND2 | hap204 | C     | 1          | 1    | -          | -    | 2         | 20   | -   |
| Tfreitas    | Itaipava            | RJ    | 41 | control,ND1,ND2 | hap203 | C     | 1          | 34   | 45         | 45   | 2         | 11   | 59  |
| CFBH-T4380  | Petrópolis          | RJ    | 42 | control,ND1,ND2 | hap68  | C     | -          | -    | 54         | 55   | 11        | 13   | -   |
| CFBH-T9331  | Guapimirim          | RJ    | 43 | control,ND1,ND2 | hap205 | C     | 1          | 6    | 4          | 94   | 2         | 13   | 60  |
| CFBH-T10355 | Seropédica          | RJ    | 44 | control,ND1,ND2 | hap112 | C     | 1          | 6    | -          | -    | -         | -    | -   |
| CFBH-T3377  | Itaguaí             | RJ    | 45 | control,ND1,ND2 | hap44  | C     | -          | -    | -          | -    | 11        | 11   | -   |
| CFBH-T3381  | Itaguaí             | RJ    | 45 | control,ND1,ND2 | hap208 | N     | 1          | 6    | -          | -    | 2         | 2    | -   |
| CFBH-T3385  | Itaguaí             | RJ    | 45 | control,ND1,ND2 | hap42  | C     | 6          | 6    | -          | -    | 2         | 2    | -   |
| CFBH-T3387  | Itaguaí             | RJ    | 45 | control,ND1,ND2 | hap43  | C     | -          | -    | 44         | 45   | 2         | 2    | -   |
| CFBH-T3422  | Itaguaí             | RJ    | 45 | control,ND1,ND2 | hap44  | C     | -          | -    | 45         | 46   | 2         | 2    | -   |
| CFBH-T2317  | Cristina            | MG    | 46 | control,ND1,ND2 | hap13  | C     | 5          | 5    | 6          | 20   | 2         | 2    | 61  |
| CFBH-T5086  | Cristina            | MG    | 46 | control,ND1,ND2 | hap72  | C     | 5          | 5    | 56         | 57   | -         | -    | -   |
| CFBH-T5087  | Cristina            | MG    | 46 | control,ND1,ND2 | hap73  | C     | 5          | 5    | 58         | 13   | 2         | -    | 62  |
| CFBH-T3099  | S. R. Passa Quatro  | SP    | 47 | control,ND1,ND2 | hap21  | C     | 5          | 5    | 30         | 59   | -         | 2    | -   |
| CFBH-T7699  | Bauru               | SP    | 48 | control,ND1,ND2 | hap95  | C     | 5          | 5    | -          | -    | 2         | 12   | -   |
| CFBH-T7705  | Bauru               | SP    | 48 | control,ND1,ND2 | hap96  | C     | 5          | 5    | 13         | 13   | 1         | 2    | 63  |
| CFBH-T7712  | Bauru               | SP    | 48 | control,ND1,ND2 | hap95  | C     | 5          | 10   | 11         | 20   | -         | -    | -   |
| CFBH-T7717  | Bauru               | SP    | 48 | control,ND1,ND2 | hap95  | C     | -          | -    | -          | -    | 10        | 12   | -   |
| CFBH-T7727  | Bauru               | SP    | 48 | control,ND1,ND2 | hap97  | C     | 5          | 5    | 70         | 11   | -         | -    | -   |
| CFBH-T0867  | Sto. Ant. do Pinhal | SP    | 49 | control,ND1,ND2 | hap5   | C     | 6          | 6    | 6          | 6    | 2         | 2    | 64  |

| number      | municipality        | state | L  | mtDNA           |        |       | nuclear    |      |            |      |           |      |     |
|-------------|---------------------|-------|----|-----------------|--------|-------|------------|------|------------|------|-----------|------|-----|
|             |                     |       |    | fragments       | Hap.   | clade | a.polypep. |      | crystallin |      | rhodopsin |      | STR |
|             |                     |       |    |                 |        |       | al.1       | al.2 | al.1       | al.2 | al.1      | al.2 |     |
| CFBH-T0868  | Sto. Ant. do Pinhal | SP    | 49 | control,ND1,ND2 | hap5   | C     | 5          | 6    | 7          | 7    | 2         | 2    | 65  |
| CFBH-T1278  | S. Luís Paraitinga  | SP    | 50 | control,ND1,ND2 | hap8   | C     | 5          | 5    | 16         | 17   | 2         | 2    | 66  |
| CFBH-T6526  | S. Luís Paraitinga  | SP    | 50 | control,ND1,ND2 | hap86  | C     | 5          | 5    | 22         | 6    | 2         | 2    | 67  |
| CFBH-T3170  | Nat. da Serra       | SP    | 51 | control,ND1,ND2 | hap22  | C     | -          | -    | 6          | 4    | 2         | 2    | -   |
| CFBH-T3174  | Nat. da Serra       | SP    | 51 | control,ND1,ND2 | hap4   | C     | 5          | 5    | 32         | 25   | 2         | 2    | 68  |
| CFBH-T0336  | Ubatuba             | SP    | 52 | control,ND1,ND2 | hap4   | C     | 5          | 5    | 4          | 5    | 2         | 2    | 69  |
| CFBH-T2588  | Ubatuba             | SP    | 52 | control,ND1,ND2 | hap16  | C     | 5          | 6    | 24         | 25   | 2         | 11   | 70  |
| CFBH-T3628  | Ubatuba             | SP    | 52 | control,ND1,ND2 | hap47  | C     | 14         | 15   | 4          | 5    | 2         | 2    | 71  |
| CFBH-T3633  | Ubatuba             | SP    | 52 | control,ND1,ND2 | hap48  | C     | 6          | 6    | 45         | 22   | 2         | 2    | 72  |
| CFBH-T3638  | Ubatuba             | SP    | 52 | control,ND1,ND2 | hap49  | C     | 6          | 6    | 49         | 49   | 2         | 2    | 73  |
| CFBH-T3659  | Ubatuba             | SP    | 52 | control,ND1,ND2 | hap50  | C     | 6          | 6    | 49         | 49   | 2         | 2    | 74  |
| CFBH-T3803  | Caraguatatuba       | SP    | 53 | control,ND1,ND2 | hap53  | C     | 5          | 16   | 22         | 22   | 2         | 2    | 75  |
| CFBH-T3806  | Caraguatatuba       | SP    | 53 | control,ND1,ND2 | hap13  | C     | 5          | 6    | 41         | 9    | 2         | 2    | 76  |
| CFBH-T3834  | Caraguatatuba       | SP    | 53 | control,ND1,ND2 | hap54  | C     | 5          | 5    | 13         | 28   | 2         | 2    | 77  |
| CFBH-T3836  | Caraguatatuba       | SP    | 53 | control,ND1,ND2 | hap55  | C     | 5          | 6    | 22         | 41   | 2         | 2    | 78  |
| CFBH-T8867  | São Sebastião       | SP    | 54 | ND1,ND2         | hap107 | C     | 5          | 17   | -          | -    | 2         | 2    | -   |
| CFBH-T8890  | São Sebastião       | SP    | 54 | ND1,ND2         | hap108 | C     | 5          | 6    | -          | -    | 1         | 2    | -   |
| CFBH-T8891  | São Sebastião       | SP    | 54 | control,ND1,ND2 | hap109 | C     | 5          | 5    | -          | -    | 2         | 2    | -   |
| CFBH-T8900  | São Sebastião       | SP    | 54 | control,ND1,ND2 | hap109 | C     | 5          | 6    | 6          | 22   | 2         | 2    | 79  |
| CFBH-T2664  | Ilha Bela           | SP    | 55 | control,ND1,ND2 | hap17  | C     | 5          | 6    | 22         | 22   | 2         | 2    | 80  |
| CFBH-T4008  | Ilha Bela           | SP    | 55 | control,ND1,ND2 | hap63  | C     | 5          | 5    | -          | -    | 2         | 2    | -   |
| CFBH-T4009  | Ilha Bela           | SP    | 55 | control,ND1,ND2 | hap64  | C     | 5          | 6    | -          | -    | 2         | 2    | -   |
| CFBH-T4010  | Ilha Bela           | SP    | 55 | control,ND1,ND2 | hap65  | C     | 5          | 5    | 22         | 22   | 2         | 2    | 81  |
| CFBH-T6033  | Ilha Bela           | SP    | 55 | control,ND1,ND2 | hap17  | C     | 5          | 5    | 22         | 22   | 2         | 2    | 82  |
| CFBH-T6048  | Ilha Bela           | SP    | 55 | control,ND1,ND2 | hap63  | C     | 5          | 6    | -          | -    | 2         | 2    | -   |
| CFBH-T6053  | Ilha Bela           | SP    | 55 | control,ND1,ND2 | hap85  | C     | 6          | 6    | 22         | 22   | 2         | 2    | 83  |
| CFBH-T6054  | Ilha Bela           | SP    | 55 | control,ND1,ND2 | hap13  | C     | 5          | 5    | 22         | 22   | 2         | 2    | 84  |
| H-466       | Bertioga            | SP    | 56 | control,ND1,ND2 | hap185 | C     | 6          | 6    | 5          | 9    | -         | -    | -   |
| H-478       | Bertioga            | SP    | 56 | control,ND1,ND2 | hap183 | C     | 5          | 17   | -          | -    | 2         | 2    | -   |
| H-485       | Bertioga            | SP    | 56 | control,ND1,ND2 | hap109 | C     | 5          | 5    | -          | -    | 2         | 2    | -   |
| H-488       | Bertioga            | SP    | 56 | control,ND1,ND2 | hap184 | C     | 5          | 5    | 6          | 22   | -         | -    | -   |
| UF94/18     | Bertioga            | SP    | 56 | control,ND1,ND2 | hap109 | C     | 6          | 6    | -          | -    | 2         | 2    | -   |
| UF94/30     | Bertioga            | SP    | 56 | control,ND1,ND2 | hap183 | C     | 5          | 12   | 22         | 22   | 2         | 2    | 85  |
| CFBH-T1956  | Cubatão             | SP    | 57 | control,ND1,ND2 | hap10  | C     | 5          | 10   | 6          | 19   | 2         | 2    | 86  |
| CFBH-T2516  | Cubatão             | SP    | 57 | control,ND1,ND2 | hap14  | C     | 5          | 5    | 21         | 22   | 10        | 2    | 87  |
| CFBH-T2517  | Cubatão             | SP    | 57 | control,ND1,ND2 | hap15  | C     | 5          | 5    | 23         | 22   | 2         | 2    | 88  |
| CFBH-T3491  | Cubatão             | SP    | 57 | control,ND1,ND2 | hap45  | C     | -          | -    | 47         | 9    | 2         | 2    | -   |
| CFBH-T3896  | Cubatão             | SP    | 57 | control,ND1,ND2 | hap57  | C     | 5          | 5    | -          | -    | 2         | 2    | -   |
| CFBH-T3897  | Cubatão             | SP    | 57 | control,ND1,ND2 | hap58  | C     | 5          | 5    | 23         | 41   | 5         | 2    | 89  |
| CFBH-T3910  | Cubatão             | SP    | 57 | control,ND1,ND2 | hap59  | C     | 5          | 17   | -          | -    | 2         | 2    | -   |
| CFBH-T5522  | Cubatão             | SP    | 57 | control,ND1,ND2 | hap75  | C     | 5          | 1    | 63         | 37   | 2         | 2    | 90  |
| AF1430      | Santos              | SP    | 58 | control,ND1,ND2 | hap179 | C     | 5          | 1    | 22         | 22   | 2         | 2    | 93  |
| AF1435      | Santos              | SP    | 58 | control,ND1,ND2 | hap180 | C     | 5          | 17   | -          | -    | 2         | 2    | -   |
| AF1443      | Santos              | SP    | 58 | control,ND1,ND2 | hap181 | C     | 5          | 5    | 6          | 22   | 12        | 19   | 94  |
| CFBH-T3953  | Santos              | SP    | 58 | control,ND1,ND2 | hap61  | C     | 5          | 18   | 22         | 41   | 2         | 2    | 91  |
| CFBH-T3954  | Santos              | SP    | 58 | control,ND1,ND2 | hap62  | C     | 5          | 5    | 41         | 22   | 2         | 2    | 92  |
| MTR 16675   | Santo André         | SP    | 59 | control,ND1,ND2 | hap13  | C     | 5          | 5    | 46         | 22   | 2         | 2    | 95  |
| MTR10400    | Santo André         | SP    | 59 | control,ND1,ND2 | hap154 | C     | 5          | 10   | 35         | 22   | -         | -    | -   |
| MTR10402    | Santo André         | SP    | 59 | control,ND1,ND2 | hap155 | C     | 5          | 5    | -          | -    | 2         | 2    | -   |
| IT-H0023    | São Bernardo        | SP    | 60 | control,ND1,ND2 | hap163 | C     | 10         | 10   | 22         | 22   | 2         | 2    | 96  |
| IT-H0025    | São Bernardo        | SP    | 60 | control,ND1,ND2 | hap164 | C     | 5          | 10   | 22         | 22   | 2         | 2    | 97  |
| CFBH-T10514 | Itanhaém            | SP    | 61 | control,ND1,ND2 | hap113 | C     | 5          | 5    | 11         | 12   | 2         | 2    | 100 |
| CFBH-T3856  | Itanhaém            | SP    | 61 | control,ND1,ND2 | hap56  | C     | 5          | 5    | 52         | 53   | 2         | 2    | 98  |
| CFBH-T3912  | Itanhaém            | SP    | 61 | control,ND1,ND2 | hap60  | C     | 5          | 10   | 20         | 35   | 2         | 2    | 99  |

| number      | municipality    | state | L  | mtDNA           |        |       | nuclear    |      |            |      |           |      | STR |  |     |
|-------------|-----------------|-------|----|-----------------|--------|-------|------------|------|------------|------|-----------|------|-----|--|-----|
|             |                 |       |    | fragments       | Hap.   | clade | a.polypep. |      | crystallin |      | rhodopsin |      |     |  |     |
|             |                 |       |    |                 |        |       | al.1       | al.2 | al.1       | al.2 | al.1      | al.2 |     |  |     |
| CFBH-T5869  | Peruíbe         | SP    | 62 | control,ND1,ND2 | hap83  | C     |            |      |            |      |           |      |     |  | -   |
| CFBH-T5870  | Peruíbe         | SP    | 62 | control,ND1,ND2 | hap83  | C     | 5          | 5    | 26         | 29   | 2         | 2    |     |  | 101 |
| CFBH-T5871  | Peruíbe         | SP    | 62 | control,ND1,ND2 | hap84  | C     | 4          | 5    | 28         | 8    | 2         | 2    |     |  | 102 |
| AF122       | Iguape          | SP    | 63 | control,ND1,ND2 | hap143 | C     | 4          | 16   | -          | -    | 2         | 2    |     |  | -   |
| AF147       | Iguape          | SP    | 63 | control,ND1,ND2 | hap144 | C     | 5          | 5    | -          | -    | 2         | 2    |     |  | -   |
| AF151       | Iguape          | SP    | 63 | control,ND1,ND2 | hap145 | C     | 5          | 5    | 11         | 11   | 2         | 2    |     |  | 106 |
| AF160       | Iguape          | SP    | 63 | control,ND1,ND2 | hap147 | C     | 5          | 16   | 9          | 9    | 2         | 2    |     |  | 107 |
| AF169       | Iguape          | SP    | 63 | control,ND1,ND2 | hap90  | C     | 5          | 5    | 9          | 11   | -         | -    |     |  | -   |
| CFBH-T2246  | Iguape          | SP    | 63 | control,ND1,ND2 | hap11  | C     | 5          | 5    | -          | -    | 9         | 9    |     |  | -   |
| CFBH-T2248  | Iguape          | SP    | 63 | control,ND1,ND2 | hap12  | C     | 5          | 5    | -          | -    | 2         | 2    |     |  | -   |
| CFBH-T4031  | Iguape          | SP    | 63 | control,ND1,ND2 | hap66  | C     | 5          | 5    | 8          | 20   | 2         | 2    |     |  | 103 |
| CFBH-T4032  | Iguape          | SP    | 63 | control,ND1,ND2 | hap67  | C     | 5          | 1    | 20         | 11   | 2         | 2    |     |  | 104 |
| CFBH-T5144  | Iguape          | SP    | 63 | control,ND1,ND2 | hap74  | C     | 1          | 16   | 60         | 61   | 2         | 2    |     |  | 105 |
| CFBH-T6957  | Iguape          | SP    | 63 | control,ND1,ND2 | hap88  | C     | 19         | 19   | -          | -    | 2         | 2    |     |  | -   |
| CFBH-T6976  | Iguape          | SP    | 63 | control,ND1,ND2 | hap89  | C     | 5          | 5    | -          | -    | 2         | 2    |     |  | -   |
| CFBH-T7034  | Iguape          | SP    | 63 | control,ND1,ND2 | hap90  | C     | 5          | 5    | 9          | 27   | -         | -    |     |  | -   |
| CFBH-T6952  | Pariquera Açú   | SP    | 64 | control,ND1,ND2 | hap87  | C     | 10         | 16   | -          | -    | 2         | 11   |     |  | -   |
| CFBH-T7322  | Ilha Comprida   | SP    | 65 | control,ND1,ND2 | hap91  | C     | 5          | 5    | 13         | 13   | 2         | 2    |     |  | 108 |
| CFBH-T10697 | Cananéia        | SP    | 66 | control,ND1,ND2 | hap103 | C     | 5          | 5    | 13         | 13   | 2         | 2    |     |  | 111 |
| CFBH-T8433  | Cananéia        | SP    | 66 | control,ND1,ND2 | hap103 | C     | 5          | 5    | -          | -    | 2         | 2    |     |  | -   |
| CFBH-T8434  | Cananéia        | SP    | 66 | control,ND1,ND2 | hap104 | C     | 5          | 5    | 13         | 11   | 1         | 2    |     |  | 109 |
| CFBH-T8547  | Cananéia        | SP    | 66 | control,ND1,ND2 | hap105 | C     | 5          | 23   | 13         | 13   | 2         | 2    |     |  | 110 |
| CFBH-T8548  | Cananéia        | SP    | 66 | control,ND1,ND2 | hap104 | C     | 5          | 5    | -          | -    | 2         | 2    |     |  | -   |
| CFBH-T8683  | Cananéia        | SP    | 66 | control,ND1,ND2 | hap106 | C     | 5          | 5    | -          | -    | 2         | 2    |     |  | -   |
| CFBH-T5155  | Ilha do Cardoso | SP    | 67 | control,ND1,ND2 | hap32  | C     | 5          | 5    | 62         | 22   | 2         | 2    |     |  | 112 |
| AF403       | São Paulo       | SP    | 68 | control         | hap149 | C     | 5          | 10   | 20         | 22   | 2         | 2    |     |  | 113 |
| MTR 9957    | São Paulo       | SP    | 68 | control,ND1,ND2 | hap113 | C     | 5          | 5    | 41         | 22   | 2         | 2    |     |  | 115 |
| MTR 9958    | São Paulo       | SP    | 68 | control,ND1,ND2 | hap188 | C     | 5          | 5    | -          | -    | 2         | 2    |     |  | -   |
| MTR 9959    | São Paulo       | SP    | 68 | control,ND1,ND2 | hap189 | C     | 5          | 5    | 41         | 41   | 2         | 2    |     |  | 116 |
| MTR 9960    | São Paulo       | SP    | 68 | control,ND1,ND2 | hap5   | C     | 4          | 5    | -          | -    | 2         | 2    |     |  | -   |
| MTR 9963    | São Paulo       | SP    | 68 | control,ND1,ND2 | hap182 | C     | 5          | 5    | 6          | 11   | 2         | 2    |     |  | 114 |
| CFBH-T3108  | Cotia           | SP    | 69 | control,ND1,ND2 | hap13  | C     | 5          | 5    | 28         | 32   | -         | -    |     |  | -   |
| CFBH-T8274  | Biritiba Mirim  | SP    | 70 | control,ND1,ND2 | hap29  | C     | 5          | 5    | 6          | 9    | -         | -    |     |  | -   |
| CFBH-T8275  | Biritiba Mirim  | SP    | 70 | control,ND1,ND2 | hap101 | C     | 17         | 17   | 14         | 26   | 2         | 2    |     |  | 117 |
| CFBH-T8276  | Biritiba Mirim  | SP    | 70 | control,ND1,ND2 | hap102 | C     | 5          | 5    | -          | -    | -         | -    |     |  | -   |
| Uniban2555  | Biritiba Mirim  | SP    | 70 | control,ND1,ND2 | hap5   | C     | 28         | 17   | 6          | 6    | 2         | 11   |     |  | 118 |
| CFBH-T3180  | Santa Isabel    | SP    | 71 | control,ND1,ND2 | hap5   | C     | 5          | 6    | 33         | 22   | 2         | 2    |     |  | 119 |
| CFBH-T3184  | Santa Isabel    | SP    | 71 | control,ND1,ND2 | hap23  | C     | 5          | 5    | 22         | 4    | 2         | 2    |     |  | 120 |
| CFBH-T3189  | Santa Isabel    | SP    | 71 | control,ND1,ND2 | hap24  | C     | 5          | 5    | 6          | 6    | -         | -    |     |  | -   |
| CFBH-T3190  | Santa Isabel    | SP    | 71 | control,ND1,ND2 | hap24  | C     | 5          | 5    | 20         | 6    | 12        | 6    |     |  | 124 |
| CFBH-T3194  | Santa Isabel    | SP    | 71 | control,ND1,ND2 | hap25  | C     | 5          | 11   | 4          | 22   | -         | -    |     |  | -   |
| CFBH-T3195  | Santa Isabel    | SP    | 71 | control,ND1,ND2 | hap26  | C     | 5          | 5    | 34         | 22   | 2         | 2    |     |  | 121 |
| CFBH-T3202  | Santa Isabel    | SP    | 71 | control,ND1,ND2 | hap27  | C     | -          | -    | 35         | 22   | 2         | 2    |     |  | -   |
| CFBH-T3204  | Santa Isabel    | SP    | 71 | control,ND1,ND2 | hap28  | C     | 12         | 11   | 36         | 37   | -         | -    |     |  | -   |
| CFBH-T3206  | Santa Isabel    | SP    | 71 | control,ND1,ND2 | hap29  | C     | 6          | 6    | 6          | 6    | 1         | 2    |     |  | 122 |
| CFBH-T4426  | Santa Isabel    | SP    | 71 | control,ND1,ND2 | hap69  | C     | 5          | 5    | 35         | 9    | 14        | 2    |     |  | 123 |
| CFBH-T4427  | Santa Isabel    | SP    | 71 | control,ND1,ND2 | hap70  | C     | 5          | 5    | 41         | 11   | -         | -    |     |  | -   |
| MTR15559    | Iperó           | SP    | 72 | ND1,ND2         | hap192 | C     | 5          | 5    | -          | -    | 12        | 12   |     |  | -   |
| IT-H0437    | Juquitiba       | SP    | 73 | control,ND1,ND2 | hap167 | C     | 5          | 5    | -          | -    | 12        | 6    |     |  | -   |
| IT-H0438    | Juquitiba       | SP    | 73 | control,ND1,ND2 | hap168 | C     | 5          | 10   | 22         | 11   | 2         | 18   |     |  | 125 |
| IT-H0439    | Juquitiba       | SP    | 73 | control,ND1,ND2 | hap45  | C     | 5          | 10   | -          | -    | -         | -    |     |  | -   |
| IT-H0459    | Juquitiba       | SP    | 73 | control,ND1,ND2 | hap169 | C     | 5          | 5    | -          | -    | 2         | 2    |     |  | -   |
| IT-H0461    | Juquitiba       | SP    | 73 | control,ND1,ND2 | hap66  | C     | 17         | 10   | 20         | 11   | -         | -    |     |  | -   |
| IT-H0462    | Juquitiba       | SP    | 73 | control,ND1,ND2 | hap113 | C     | 5          | 5    | 35         | 35   | 1         | 2    |     |  | 127 |

| number      | municipality    | state | L  | mtDNA           |        |       | nuclear    |      |            |      |           |      |     |
|-------------|-----------------|-------|----|-----------------|--------|-------|------------|------|------------|------|-----------|------|-----|
|             |                 |       |    | fragments       | Hap.   | clade | a.polypep. |      | crystallin |      | rhodopsin |      | STR |
|             |                 |       |    |                 |        |       | al.1       | al.2 | al.1       | al.2 | al.1      | al.2 |     |
| IT-H0463    | Juquitiba       | SP    | 73 | control,ND1,ND2 | hap45  | C     | 5          | 5    | 6          | 41   | 12        | 12   | 128 |
| IT-H0468    | Juquitiba       | SP    | 73 | control,ND1,ND2 | hap170 | C     | 5          | 5    | 9          | 11   | 2         | 2    | 126 |
| IT-H0538    | Juquitiba       | SP    | 73 | ND1,ND2         | hap171 | C     | 5          | 5    | -          | -    | -         | -    | -   |
| AF303       | Carapicufba     | SP    | 74 | control,ND1,ND2 | hap45  | C     | 5          | 5    | 9          | 11   | 6         | 6    | 129 |
| AF304       | Carapicufba     | SP    | 74 | control,ND1,ND2 | hap5   | C     | 5          | 5    | -          | -    | -         | -    | -   |
| AF316       | Carapicufba     | SP    | 74 | control,ND2     | hap148 | C     | 5          | 5    | 20         | 20   | -         | -    | -   |
| AF423       | Carapicufba     | SP    | 74 | control,ND2     | hap150 | C     | 5          | 17   | 34         | 41   | -         | -    | -   |
| ALC86/77    | Piedade         | SP    | 75 | control,ND1,ND2 | hap5   | C     | 5          | 5    | 28         | 28   | 1         | 12   | 130 |
| ALC86/80    | Piedade         | SP    | 75 | control,ND1,ND2 | hap113 | C     | 5          | 17   | -          | -    | 2         | 2    | -   |
| ALC86/81    | Piedade         | SP    | 75 | control,ND1,ND2 | hap113 | C     | 5          | 5    | 41         | 41   | 12        | 12   | 131 |
| ALC87/1     | Piedade         | SP    | 75 | control,ND1,ND2 | hap160 | C     | 5          | 5    | 28         | 28   | 10        | 2    | 132 |
| ALC87/3     | Piedade         | SP    | 75 | control,ND1,ND2 | hap161 | C     | 5          | 5    | -          | -    | -         | -    | -   |
| ALC87/5     | Piedade         | SP    | 75 | control,ND1,ND2 | hap162 | C     | 5          | 5    | -          | -    | 2         | 2    | -   |
| H023        | Piedade         | SP    | 75 | control,ND1,ND2 | hap113 | C     | 5          | 5    | 64         | 20   | 12        | 6    | 135 |
| H035        | Piedade         | SP    | 75 | control,ND1,ND2 | hap186 | C     | 5          | 17   | 41         | 22   | -         | -    | -   |
| IT-H0207    | Piedade         | SP    | 75 | control,ND1,ND2 | hap165 | C     | 5          | 5    | 6          | 41   | 12        | 12   | 133 |
| IT-H0208    | Piedade         | SP    | 75 | control,ND1,ND2 | hap166 | C     | 5          | 5    | -          | -    | 2         | 2    | -   |
| IT-H0209    | Piedade         | SP    | 75 | control,ND1,ND2 | hap66  | C     | 17         | 10   | 20         | 11   | -         | -    | -   |
| UF88/60     | Piedade         | SP    | 75 | control,ND1,ND2 | hap113 | C     | 5          | 5    | 64         | 20   | 12        | 6    | 134 |
| H0300       | Buri            | SP    | 76 | control,ND1,ND2 | hap174 | C     | 5          | 5    | -          | -    | 10        | 1    | -   |
| H0355       | Buri            | SP    | 76 | control,ND1,ND2 | hap151 | C     | 5          | 5    | 20         | 29   | 1         | 1    | 141 |
| H0356       | Buri            | SP    | 76 | control,ND1,ND2 | hap187 | C     | 5          | 5    | 10         | 11   | 1         | 1    | 140 |
| H0366       | Buri            | SP    | 76 | control,ND1,ND2 | hap152 | C     | 5          | 5    | 20         | 11   | 10        | 1    | 139 |
| IT-H0573    | Buri            | SP    | 76 | control,ND1,ND2 | hap173 | C     | 5          | 5    | 29         | 29   | 1         | 12   | 137 |
| IT-H0580    | Buri            | SP    | 76 | control,ND1,ND2 | hap80  | C     | 5          | 10   | -          | -    | 10        | 10   | -   |
| IT-H0581    | Buri            | SP    | 76 | control,ND1,ND2 | hap174 | C     | 5          | 5    | -          | -    | 10        | 1    | -   |
| IT-H0583    | Buri            | SP    | 76 | control,ND1,ND2 | hap175 | C     | 10         | 10   | 10         | 26   | 1         | 1    | 138 |
| IT-H0610    | Buri            | SP    | 76 | control,ND1,ND2 | hap151 | C     | 5          | 10   | 9          | 11   | -         | -    | -   |
| IT-H0612    | Buri            | SP    | 76 | control,ND1,ND2 | hap152 | C     | 5          | 5    | 26         | 27   | 12        | 12   | 136 |
| IT-H0613    | Buri            | SP    | 76 | control,ND1,ND2 | hap151 | C     | 5          | 5    | -          | -    | 1         | 1    | -   |
| CFBH-T5679  | Ribeirão Grande | SP    | 77 | control,ND1,ND2 | hap76  | C     | 5          | 5    | 11         | 29   | 10        | 1    | 142 |
| CFBH-T5680  | Ribeirão Grande | SP    | 77 | control,ND1,ND2 | hap77  | C     | 5          | 5    | 64         | 9    | 1         | 12   | 143 |
| CFBH-T5681  | Ribeirão Grande | SP    | 77 | control,ND1,ND2 | hap78  | C     | 5          | 10   | 28         | 11   | 12        | 12   | 144 |
| CFBH-T5682  | Ribeirão Grande | SP    | 77 | control,ND1,ND2 | hap79  | C     | 5          | 5    | -          | -    | 10        | 12   | -   |
| CFBH-T5683  | Ribeirão Grande | SP    | 77 | control,ND1,ND2 | hap80  | C     | 5          | 5    | -          | -    | 1         | 12   | -   |
| CFBH-T5684  | Ribeirão Grande | SP    | 77 | control,ND1,ND2 | hap81  | C     | 5          | 10   | -          | -    | 1         | 12   | -   |
| CFBH-T5685  | Ribeirão Grande | SP    | 77 | control,ND1,ND2 | hap82  | C     | 5          | 5    | 26         | 26   | 1         | 12   | 145 |
| CFBH-T5686  | Ribeirão Grande | SP    | 77 | control,ND1,ND2 | hap79  | C     | 5          | 10   | -          | -    | 2         | 12   | -   |
| CFBH-T5687  | Ribeirão Grande | SP    | 77 | control,ND1,ND2 | hap80  | C     | 5          | 5    | 29         | 9    | 1         | 2    | 146 |
| CFBH-T5688  | Ribeirão Grande | SP    | 77 | control,ND1,ND2 | hap80  | C     | 5          | 5    | -          | -    | 1         | 12   | -   |
| CFBH-T5041  | Guapiara        | SP    | 78 | control,ND1,ND2 | hap71  | C     | 5          | 10   | 40         | 11   | 1         | 12   | 147 |
| CFBH-T1034  | Ribeirão Branco | SP    | 79 | control,ND1,ND2 | hap6   | C     | 4          | 5    | 10         | 10   | -         | -    | -   |
| CFBH-T1035  | Ribeirão Branco | SP    | 79 | control,ND1,ND2 | hap7   | C     | 5          | 5    | 9          | 10   | 1         | 2    | 148 |
| IIIH-149    | Wenceslau Brás  | PR    | 80 | control,ND1,ND2 | hap176 | C     | 5          | 1    | 10         | 26   | 12        | 12   | 149 |
| IIIH-172    | Wenceslau Brás  | PR    | 80 | control,ND1,ND2 | hap177 | C     | 5          | 5    | 10         | 26   | 10        | 12   | 150 |
| IIIH-224    | Wenceslau Brás  | PR    | 80 | control,ND1,ND2 | hap178 | C     | 5          | 5    | 10         | 10   | 10        | 12   | 151 |
| II - H046   | Pinhalão        | PR    | 81 | control,ND1,ND2 | hap172 | C     | 5          | 1    | 10         | 26   | 10        | 12   | 152 |
| II - H114   | Ortigueira      | PR    | 82 | control,ND1,ND2 | hap151 | C     | 5          | 5    | 86         | 13   | -         | -    | -   |
| CFBH-T11188 | Ortigueira      | PR    | 82 | control,ND1,ND2 | hap121 | C     | 5          | 1    | 9          | 9    | 12        | 12   | 153 |
| CFBH-T9476  | Teodoro Sampaio | SP    | 83 | control,ND1,ND2 | hap199 | C     | 5          | 1    | 10         | 26   | 12        | 12   | 154 |
| CFBH-T7881  | Teodoro Sampaio | SP    | 83 | control,ND1,ND2 | hap200 | C     | 5          | 1    | 93         | 26   | 10        | 12   | 155 |
| CFBH-T7897  | Teodoro Sampaio | SP    | 83 | control,ND1,ND2 | hap201 | C     | 5          | 5    | 10         | 26   | 10        | 12   | 156 |
| CFBH-T7898  | Teodoro Sampaio | SP    | 83 | control,ND1,ND2 | hap201 | C     | 5          | 1    | -          | -    | 10        | 12   | -   |
| CFBH-T9512  | Teodoro Sampaio | SP    | 83 | control,ND1,ND2 | hap202 | C     | 1          | 1    | 10         | 26   | 10        | 10   | 157 |

| number      | municipality         | state | L  | mtDNA           |        |       | nuclear     |      |            |      |           |      | STR |
|-------------|----------------------|-------|----|-----------------|--------|-------|-------------|------|------------|------|-----------|------|-----|
|             |                      |       |    | fragments       | Hap.   | clade | a.poly pep. |      | crystallin |      | rhodopsin |      |     |
|             |                      |       |    |                 |        |       | al.1        | al.2 | al.1       | al.2 | al.1      | al.2 |     |
| CFBH-T7899  | Teodoro Sampaio      | SP    | 83 | control,ND1,ND2 | hap202 | C     | 5           | 1    | -          | -    | 10        | 10   | -   |
| CFBH-T9513  | Teodoro Sampaio      | SP    | 83 | control,ND1,ND2 | hap200 | C     | 5           | 5    | -          | -    | 10        | 12   | -   |
| CFBH-T9514  | Teodoro Sampaio      | SP    | 83 | control,ND1,ND2 | hap200 | C     | 5           | 5    | 10         | 26   | 10        | 12   | 158 |
| IIBPH1333   | Canindeyú            | PAR   | 84 | control,ND1,ND2 | hap119 | C     | 5           | 1    | 10         | 9    | 10        | 12   | 159 |
| IIBPH1173   | Itapúa               | PAR   | 85 | control,ND1,ND2 | hap117 | C     | 5           | 5    | 9          | 9    | 12        | 12   | 160 |
| IIBPH1191   | Itapúa               | PAR   | 85 | control,ND1,ND2 | hap118 | C     | 5           | 5    | 9          | 9    | 10        | 12   | 161 |
| IIBPH1336   | Itapúa               | PAR   | 85 | ND1             | hap120 | C     | -           | -    | 9          | 9    | 10        | 12   | -   |
| IIBPH1342   | Itapúa               | PAR   | 85 | control,ND1,ND2 | hap121 | C     | 5           | 1    | 9          | 9    | 12        | 12   | 162 |
| IIBPH1353   | Itapúa               | PAR   | 85 | control,ND1,ND2 | hap113 | C     | 5           | 5    | 20         | 9    | 10        | 12   | 163 |
| IIBPH1356   | Itapúa               | PAR   | 85 | control,ND1,ND2 | hap113 | C     | 5           | 5    | 9          | 9    | 10        | 10   | 164 |
| MVS243      | Adrianópolis         | PR    | 86 | control,ND1,ND2 | hap196 | c1    | 4           | 5    | 28         | 13   | -         | -    | -   |
| MVS244      | Adrianópolis         | PR    | 86 | control,ND1,ND2 | hap197 | C     | 33          | 33   | 92         | 26   | 10        | 12   | 165 |
| MVS242      | Ribeira              | SP    | 87 | control,ND1,ND2 | hap195 | C     | 4           | 5    | 28         | 13   | -         | -    | -   |
| CFBH-T3619  | Quatro Barras        | PR    | 88 | control,ND1,ND2 | hap46  | c1    | -           | -    | 48         | 11   | 5         | 6    | -   |
| CFBH-T9193  | Quatro Barras        | PR    | 88 | control,ND1,ND2 | hap124 | c1    | 4           | 4    | 41         | 41   | 6         | 17   | 166 |
| CFBH-T12598 | Antonina             | PR    | 89 | control,ND1,ND2 | hap3   | c1    | 4           | 5    | -          | -    | 1         | 2    | -   |
| CFBH-T3084  | Antonina             | PR    | 89 | control,ND1,ND2 | hap18  | C     | 5           | 5    | 26         | 27   | -         | -    | -   |
| CFBH-T3085  | Antonina             | PR    | 89 | control,ND1,ND2 | hap19  | c1    | 4           | 7    | 28         | 26   | 10        | 1    | 167 |
| CFBH-T3086  | Antonina             | PR    | 89 | control,ND1,ND2 | hap20  | C     | -           | -    | 29         | 27   | 1         | 12   | -   |
| CFBH-T3304  | Morretes             | PR    | 90 | control,ND1,ND2 | hap30  | c1    | 5           | 7    | 11         | 38   | -         | -    | -   |
| CFBH-T3306  | Morretes             | PR    | 90 | control,ND1,ND2 | hap31  | c1    | 4           | 5    | 11         | 9    | 2         | 2    | 168 |
| CFBH-T3310  | Morretes             | PR    | 90 | control,ND1,ND2 | hap32  | C     | 5           | 1    | 27         | 11   | 1         | 12   | 169 |
| CFBH-T3312  | Morretes             | PR    | 90 | control,ND1,ND2 | hap33  | c1    |             |      |            |      |           |      | -   |
| K970        | São José dos Pinhais | PR    | 91 | control,ND1,ND2 | hap123 | c1    | 5           | 1    | -          | -    | 10        | 2    | -   |
| CFBH-T10261 | Guaratuba            | PR    | 92 | control,ND1,ND2 | hap111 | c1    | 4           | 7    | 8          | 9    | -         | -    | -   |
| CFBH-T3665  | Guaratuba            | PR    | 92 | control,ND1,ND2 | hap51  | c1    | 4           | 5    | 8          | 11   | -         | -    | -   |
| CFBH-T3666  | Guaratuba            | PR    | 92 | control,ND1,ND2 | hap51  | c1    | 4           | 5    | 8          | 11   | -         | -    | -   |
| CFBH-T3672  | Guaratuba            | PR    | 92 | control,ND1,ND2 | hap52  | c1    | -           | -    | 50         | 51   | -         | -    | -   |
| CFBH-T3679  | Guaratuba            | PR    | 92 | control,ND1,ND2 | hap33  | c1    | 5           | 7    | 22         | 11   | -         | -    | -   |
| CFBH-T3314  | Itapoá               | SC    | 93 | control,ND1,ND2 | hap34  | c1    | 5           | 5    | 27         | 26   | 1         | 2    | 170 |
| CFBH-T9201  | Massaranduba         | SC    | 94 | control,ND1,ND2 | hap131 | c1    | 5           | 7    | 9          | 11   | -         | -    | -   |
| CFBH-T9202  | Massaranduba         | SC    | 94 | control,ND1,ND2 | hap132 | c1    | 4           | 1    | -          | -    | 1         | 5    | -   |
| CFBH-T9202  | Massaranduba         | SC    | 94 | control,ND1,ND2 | hap133 | c1    | 4           | 5    | 9          | 9    | -         | -    | -   |
| CFBH-T9204  | Massaranduba         | SC    | 94 | control,ND1,ND2 | hap134 | c1    | 7           | 7    | 74         | 9    | 1         | 1    | 171 |
| CFBH-T9205  | Massaranduba         | SC    | 94 | control,ND1,ND2 | hap135 | c1    | 1           | 7    | 73         | 9    | 5         | 6    | 172 |
| CFBH-T9206  | Massaranduba         | SC    | 94 | control,ND1,ND2 | hap136 | c1    | 4           | 4    | 38         | 41   | 10        | 12   | 173 |
| CFBH-T9207  | Massaranduba         | SC    | 94 | control,ND1,ND2 | hap134 | c1    | 7           | 7    | -          | -    | 5         | 5    | -   |
| CFBH-T9208  | Massaranduba         | SC    | 94 | control,ND1,ND2 | hap136 | c1    | 1           | 7    | 9          | 11   | -         | -    | -   |
| CFBH-T9209  | Massaranduba         | SC    | 94 | control,ND1,ND2 | hap137 | c1    | 4           | 1    | 26         | 73   | 12        | 6    | 174 |
| CFBH-T9210  | Massaranduba         | SC    | 94 | control,ND1,ND2 | hap138 | c1    | 7           | 7    | -          | -    | 5         | 5    | -   |
| CFBH-T9211  | Massaranduba         | SC    | 94 | control,ND1,ND2 | hap139 | c1    | 7           | 7    | 15         | 9    | 5         | 5    | 175 |
| CFBH-T3316  | Rio dos Cedros       | SC    | 95 | control,ND1,ND2 | hap35  | c1    | -           | -    | 39         | 11   | 1         | 1    | -   |
| CFBH-T3320  | Rio dos Cedros       | SC    | 95 | control,ND1,ND2 | hap36  | c1    | -           | -    | 40         | 41   | 1         | 5    | -   |
| CFBH-T3323  | Rio dos Cedros       | SC    | 95 | control,ND1,ND2 | hap37  | c1    | 4           | 4    | 42         | 11   | 1         | 12   | 176 |
| CFBH-T3343  | Blumenau             | SC    | 96 | control,ND1,ND2 | hap38  | c1    | -           | -    | 14         | 9    | -         | -    | -   |
| CFBH-T3348  | Blumenau             | SC    | 96 | control,ND1,ND2 | hap39  | c1    | 4           | 4    | 11         | 15   | -         | -    | -   |
| CFBH-T3351  | Blumenau             | SC    | 96 | control,ND1,ND2 | hap40  | c1    | 13          | 7    | 15         | 9    | 1         | 5    | 177 |
| CFBH-T9194  | Blumenau             | SC    | 96 | control,ND1,ND2 | hap125 | c1    | 4           | 7    | 15         | 15   | 6         | 6    | 178 |
| CFBH-T9195  | Blumenau             | SC    | 96 | control,ND1,ND2 | hap126 | c1    | 4           | 1    | 72         | 11   | 1         | 1    | 179 |
| CFBH-T9196  | Blumenau             | SC    | 96 | control,ND1,ND2 | hap126 | c1    | 4           | 7    | 15         | 9    | 6         | 6    | 180 |
| CFBH-T9197  | Blumenau             | SC    | 96 | control,ND1,ND2 | hap127 | c1    | 4           | 1    | 73         | 9    | -         | -    | -   |
| CFBH-T9198  | Blumenau             | SC    | 96 | control,ND1,ND2 | hap128 | c1    | 7           | 7    | 15         | 73   | 10        | 5    | 181 |
| CFBH-T9199  | Blumenau             | SC    | 96 | control,ND1,ND2 | hap129 | c1    | 1           | 7    | 9          | 72   | 1         | 1    | 182 |
| CFBH-T9200  | Blumenau             | SC    | 96 | control,ND1,ND2 | hap130 | c1    | 4           | 7    | 26         | 41   | -         | -    | -   |

| number      | municipality        | state | L   | mtDNA           |        |       | nuclear    |      |            |      |           |      |     |
|-------------|---------------------|-------|-----|-----------------|--------|-------|------------|------|------------|------|-----------|------|-----|
|             |                     |       |     | fragments       | Hap.   | clade | a.polypep. |      | crystallin |      | rhodopsin |      | STR |
|             |                     |       |     |                 |        |       | al.1       | al.2 | al.1       | al.2 | al.1      | al.2 |     |
| CFBH-T10731 | Gov. Celso Ramos    | SC    | 97  | control,ND1,ND2 | hap114 | c1    | 4          | 1    | 11         | 14   | 5         | 6    | 183 |
| CFBH-T10732 | Gov. Celso Ramos    | SC    | 97  | control,ND1,ND2 | hap115 | c1    | 1          | 1    | 11         | 15   | 1         | 2    | 184 |
| CFBH-T1735  | Itapema             | SC    | 98  | control,ND1,ND2 | hap9   | c1    | 4          | 4    | 18         | 11   | -         | -    | -   |
| PUCRS       | S.. Am. Imperatriz  | SC    | 99  | control,ND1,ND2 | hap198 | c1    | 4          | 1    | 26         | 11   | 12        | 6    | 185 |
| CFBH-T8092  | Anitápolis          | SC    | 100 | control,ND1,ND2 | hap98  | c1    | 21         | 22   | -          | -    | 3         | 15   | -   |
| CFBH-T8093  | Anitápolis          | SC    | 100 | control,ND1,ND2 | hap295 | S     | -          | -    | 154        | 155  | 3         | 25   | -   |
| CFBH-T8094  | Anitápolis          | SC    | 100 | control,ND1     | hap99  | c1    | 1          | 1    | 11         | 11   | -         | -    | -   |
| CFBH-T8095  | Anitápolis          | SC    | 100 | control,ND1,ND2 | hap100 | c1    | -          | -    | -          | -    | -         | -    | -   |
| CFBH-T8096  | Anitápolis          | SC    | 100 | control,ND1,ND2 | hap100 | c1    | 22         | 22   | 155        | 155  | 25        | 16   | -   |
| CFBH-T8097  | Anitápolis          | SC    | 100 | control,ND1,ND2 | hap100 | c1    | 1          | 1    | -          | -    | 6         | 16   | -   |
| CFBH-T8098  | Anitápolis          | SC    | 100 | control,ND1,ND2 | hap296 | S     | 1          | 1    | 71         | 11   | -         | -    | 193 |
| CFBH-T8099  | Anitápolis          | SC    | 100 | control,ND1,ND2 | hap297 | S     | -          | -    | 155        | 155  | 3         | 3    | -   |
| ELMG453     | Ponte Serrada       | SC    | 101 | control,ND1,ND2 | hap299 | S     |            |      |            |      |           |      | -   |
| CFBH-T11195 | Ponte Serrada       | SC    | 101 | control,ND1,ND2 | hap122 | C     | 5          | 5    | 28         | 28   | 12        | 12   | 186 |
| CFBH-T11196 | Fernandes Pinheiro  | PR    | 102 | control,ND1,ND2 | hap292 | S     | 21         | 22   | 159        | 160  | 3         | 3    | 187 |
| MVS398      | Salete              | SC    | 103 | ND1,ND2         | hap304 | S     | -          | -    | -          | -    | 10        | 5    | -   |
| CFBH-T10793 | Xavantina           | SC    | 104 | control,ND1,ND2 | hap293 | S     | 51         | 52   | 151        | 151  | 1         | 2    | 189 |
| CFBH-T10794 | Xavantina           | SC    | 104 | control,ND1,ND2 | hap294 | S     | 53         | 54   | 152        | 153  | 2         | 2    | 190 |
| CFBH-T9184  | Xavantina           | SC    | 104 | control,ND1,ND2 | hap299 | S     | -          | -    | 156        | 156  | 3         | 15   | -   |
| CFBH-T9186  | Xavantina           | SC    | 104 | control,ND1,ND2 | hap299 | S     | 53         | 56   | 156        | 156  | 3         | 4    | 188 |
| CFBH-T9188  | Xavantina           | SC    | 104 | control,ND1,ND2 | hap299 | S     | -          | -    | 155        | 156  | 3         | 25   | -   |
| EMLG234     | Guatambú            | SC    | 105 | control,ND1,ND2 | hap299 | S     | 57         | 56   | 156        | 155  | -         | -    | -   |
| EMLG235     | Guatambú            | SC    | 105 | control,ND1,ND2 | hap299 | S     | 21         | 22   | 157        | 5    | -         | -    | -   |
| EMLG236     | Guatambú            | SC    | 105 | control,ND1,ND2 | hap300 | S     | -          | -    | 158        | 5    | -         | -    | -   |
| EMLG237     | Guatambú            | SC    | 105 | control,ND1,ND2 | hap299 | S     |            |      |            |      |           |      | -   |
| EMLG253     | Guatambú            | SC    | 105 | control,ND1,ND2 | hap299 | S     | 58         | 59   | 156        | 156  | 25        | 25   | 191 |
| EMLG453     | Guatambú            | SC    | 105 | -               | -      | -     | 21         | 22   | -          | -    | 3         | 25   | -   |
| flona062007 | Guatambú            | SC    | 105 | control,ND1,ND2 | hap292 | S     | -          | -    | 159        | 160  | 3         | 3    | -   |
| flona1603   | Guatambú            | SC    | 105 | control,ND1,ND2 | hap292 | S     | 21         | 21   | 156        | 156  | 3         | 25   | 192 |
| MNRJ33006   | Mato Castelhana     | RS    | 106 | control,ND1,ND2 | hap302 | S     | 13         | 22   | 162        | 163  | 3         | 25   | 194 |
| MNRJ33012   | Mato Castelhana     | RS    | 106 | control,ND1,ND2 | hap303 | S     | 61         | 22   | 163        | 163  | 25        | 25   | 195 |
| CFBH-T8298  | Cotiporã            | RS    | 107 | control,ND1,ND2 | hap298 | S     | 55         | 55   | -          | -    | 25        | 25   | -   |
| UFRGST667   | Nova Roma do Sul    | RS    | 108 | control,ND1,ND2 | hap305 | S     | -          | -    | 163        | 163  | 25        | 25   | -   |
| CFBH-T9213  | Bento Gonçalves     | RS    | 109 | control,ND1,ND2 | hap301 | S     | 21         | 60   | 155        | 161  | 3         | 15   | 196 |
|             | outgroups           |       |     |                 |        |       |            |      |            |      |           |      |     |
| CFBH-T1338  | <i>R. arenarum</i>  |       |     | control,ND1,ND2 |        |       |            |      |            |      |           |      |     |
| CFBH-T3051  | <i>R. icterica</i>  |       |     | control,ND1,ND2 |        |       |            |      |            |      |           |      |     |
| CFBH-T3354  | <i>R. icterica</i>  |       |     | control,ND1     |        |       |            |      |            |      |           |      |     |
| CFBH-T3361  | <i>R. granulosa</i> |       |     | control,ND1     |        |       |            |      |            |      |           |      |     |
| CFBH-T5092  | <i>R. merianae</i>  |       |     | control,ND1,ND2 |        |       |            |      |            |      |           |      |     |
| CFBH-T5731  | <i>R. merianae</i>  |       |     | control,ND1,ND2 |        |       |            |      |            |      |           |      |     |
| CFBH-T8885  | <i>R. icterica</i>  |       |     | control,ND1     |        |       |            |      |            |      |           |      |     |
| CFBH-T8933  | <i>R. icterica</i>  |       |     | ND1             |        |       |            |      |            |      |           |      |     |
