# Supplementary figures and images for: Delimiting genetic units in Neotropical toads under incomplete lineage sorting and hybridization
Source: Springer Nature journal article supplement (doi:10.1186/1471-2148-12-242), 2012-01-01

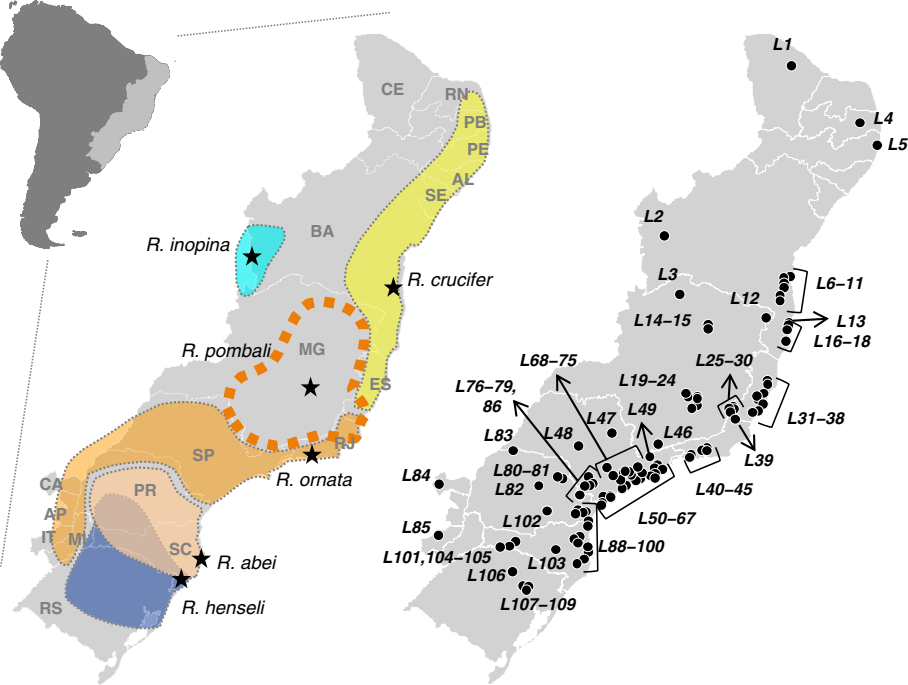

Supplement: 12862_2012_2248_MOESM3_ESM.pdf [file 12862_2012_2248_MOESM3_ESM.pdf]

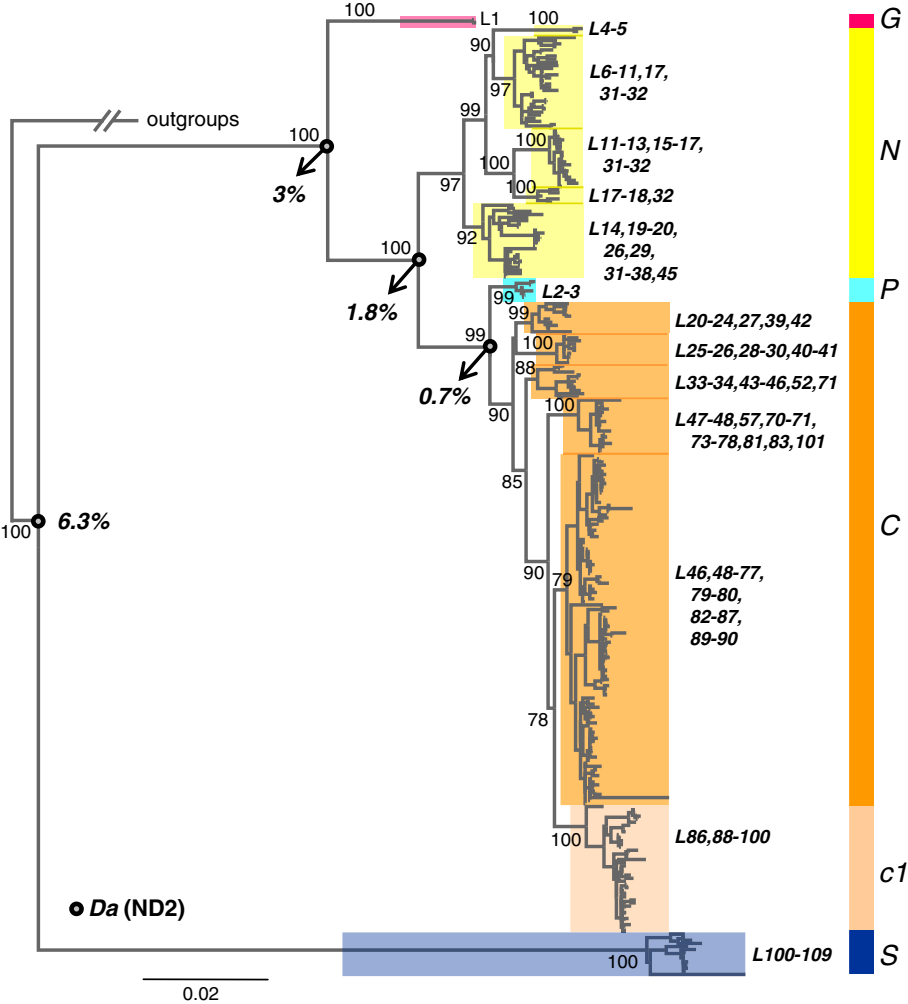

Supplement: 12862_2012_2248_MOESM4_ESM.pdf [file 12862_2012_2248_MOESM4_ESM.pdf]

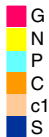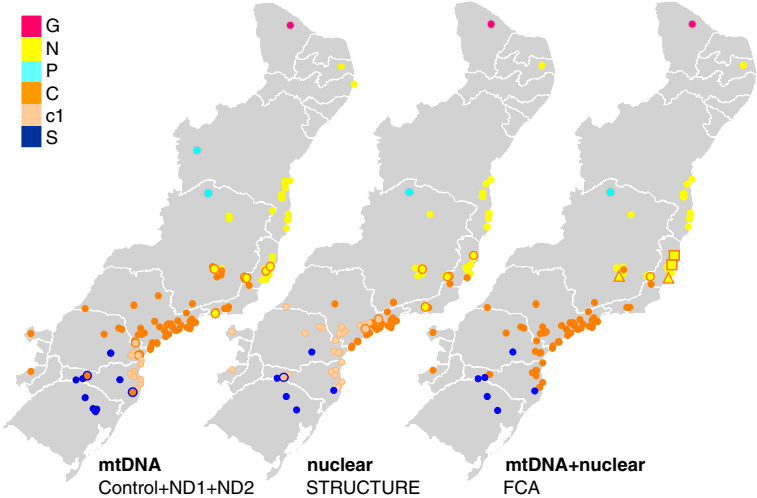

**mtDNA**  
Control+ND1+ND2

**nuclear**  
STRUCTURE

**mtDNA+nuclear**  
FCA

Supplement: 12862_2012_2248_MOESM5_ESM.pdf [file 12862_2012_2248_MOESM5_ESM.pdf]

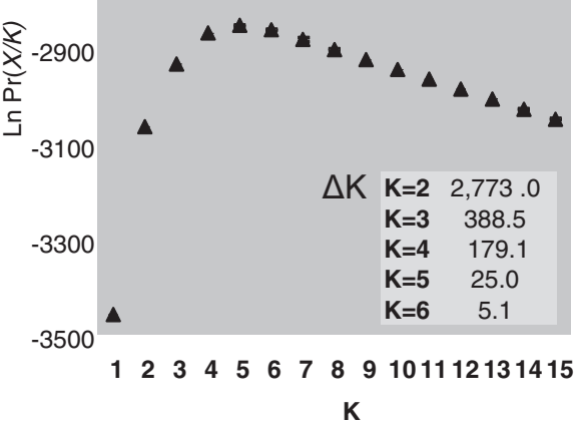

Supplement: 12862_2012_2248_MOESM6_ESM.pdf [file 12862_2012_2248_MOESM6_ESM.pdf]

mtDNA

STRUCTURE

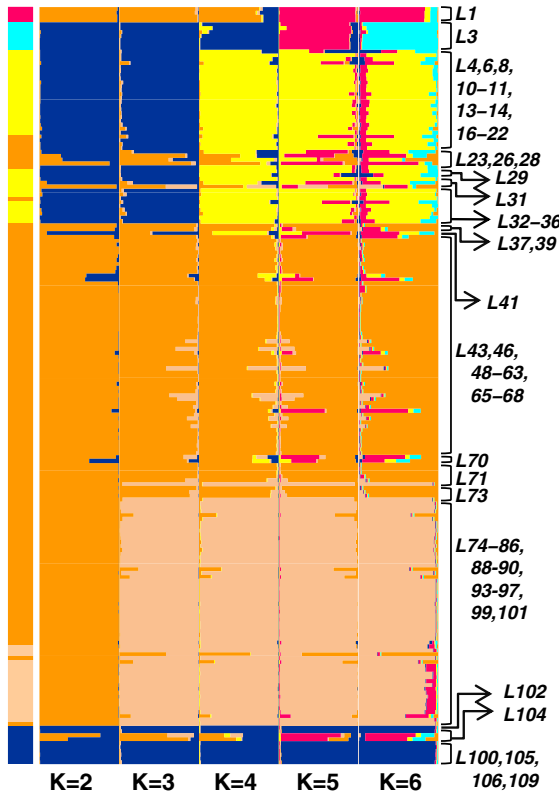

G N P C c1 S

Supplement: 12862_2012_2248_MOESM7_ESM.pdf [file 12862_2012_2248_MOESM7_ESM.pdf]

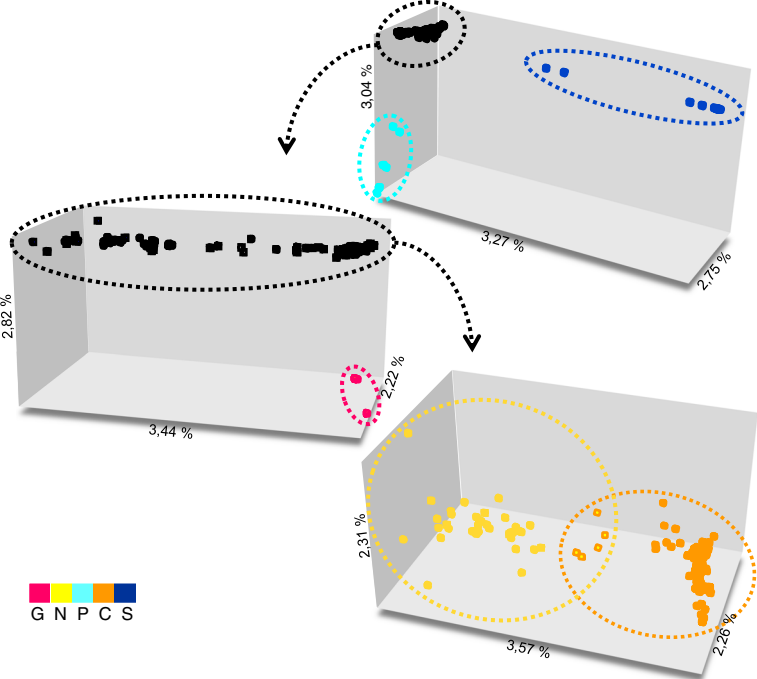

Supplement: 12862_2012_2248_MOESM8_ESM.pdf [file 12862_2012_2248_MOESM8_ESM.pdf]
